# Supplementary material
Source: PubMed Central journal article supplement (PMC10530372)
Supplement: NIHMS1920180-supplement-1.pdf [file NIHMS1920180-supplement-1.pdf]

**A**

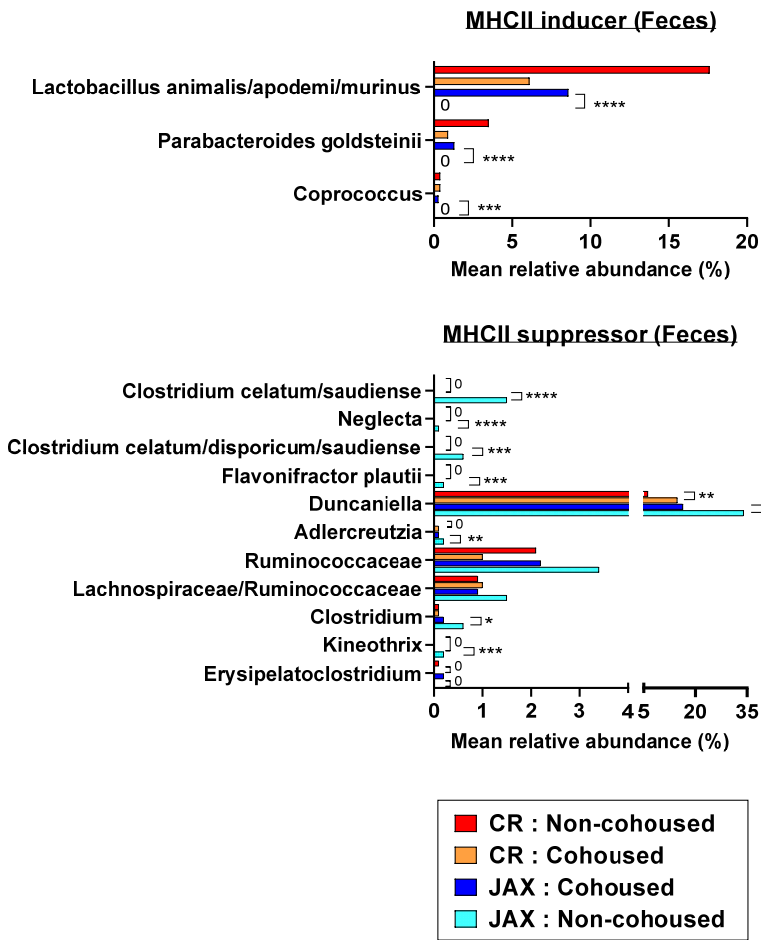

**B**

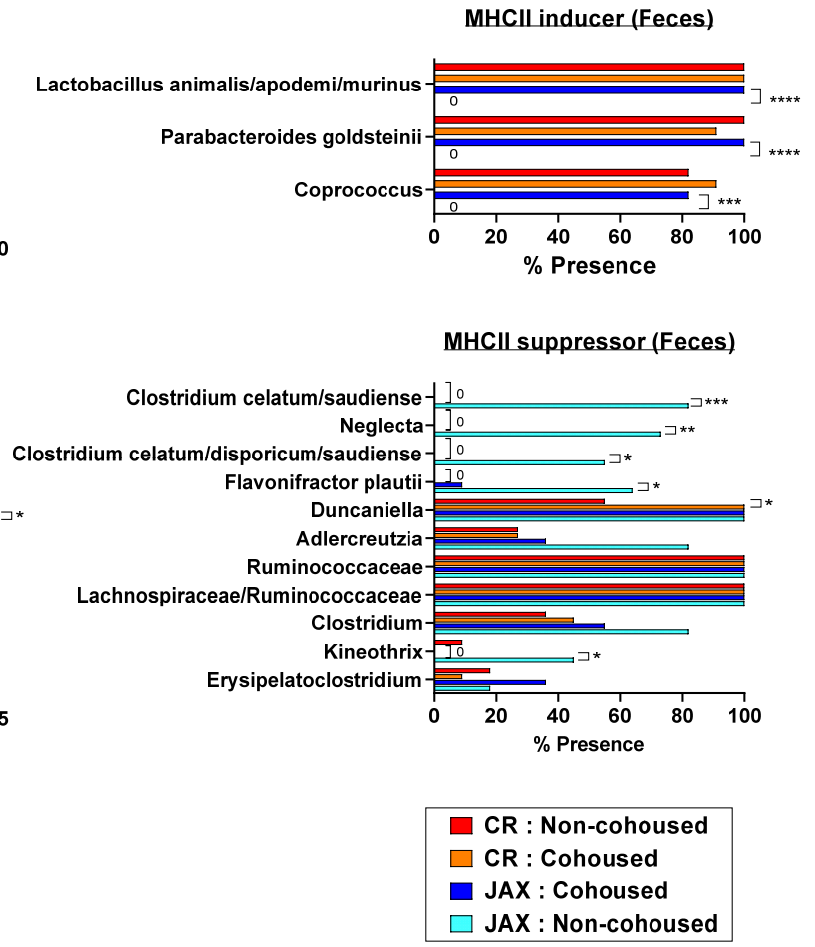

**C**

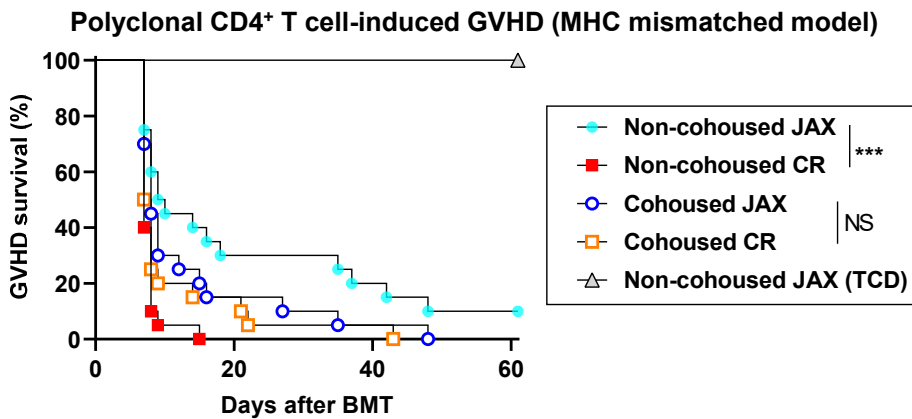

**Figure S1, related to Figure 4. MHC II-inducing microbiota are transferred after cohousing and promote GVHD lethality.**

JAX B6N and CR B6N mice were housed separately (non-cohoused) or cohoused for 4 weeks as described in **Figure 4**. The relative abundance (**A**) and frequency of presence (**B**) of MHC-II inducers and MHC-II suppressors in CR non-cohoused, CR cohoused, JAX-cohoused and JAX non-cohoused mice in feces (top) and ileum (bottom). Wilcoxon rank-sum test with p-values adjusted using Holm's method. \* $p < 0.05$ , \*\* $p < 0.01$ , \*\*\* $p < 0.001$ , \*\*\*\* $p < 0.0001$ . (**C**) After 4 week cohousing or separate housing (non-cohoused), female JAX and CR B6N mice were lethally irradiated and transplanted with BM and  $5 \times 10^6$  CD4<sup>+</sup> T cells from PC61-treated BALB/c mice. Survival by Kaplan-Meier analysis, combined from 2 replicate experiments ( $n = 20$  per T cell-replete group,  $n = 10$  in TCD group). \*\*\* $p < 0.001$ , NS: not significant.

**A**

Shannon index -- Feces (pre Tx)

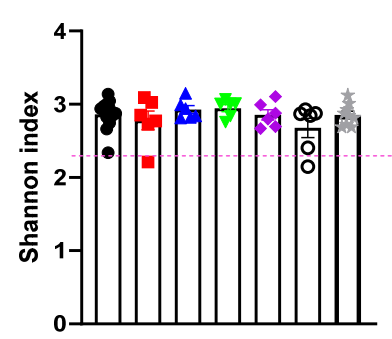**B**

Shannon index -- Feces (post Tx)

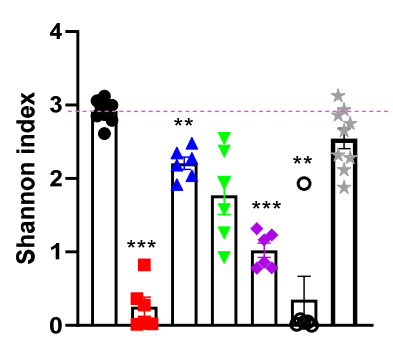**C**

Change of Shannon index --Feces (post Tx — pre Tx)

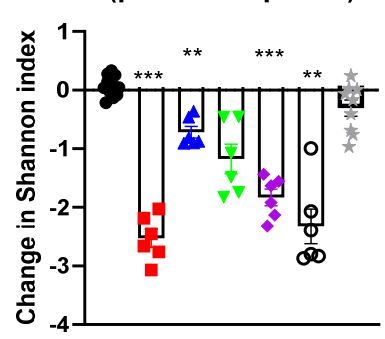**D**

Shannon index -- Ileum (post Tx)

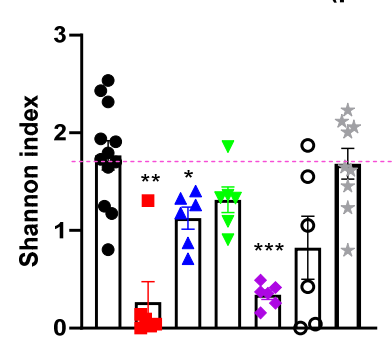

- Normal H2O
- Cefoxitin
- ▲ Gentamicin
- ◆ Vancomycin
- ▼ Metronidazole
- 4AB Cocktail
- ★ 3AB Cocktail

**E**

Overall Survival

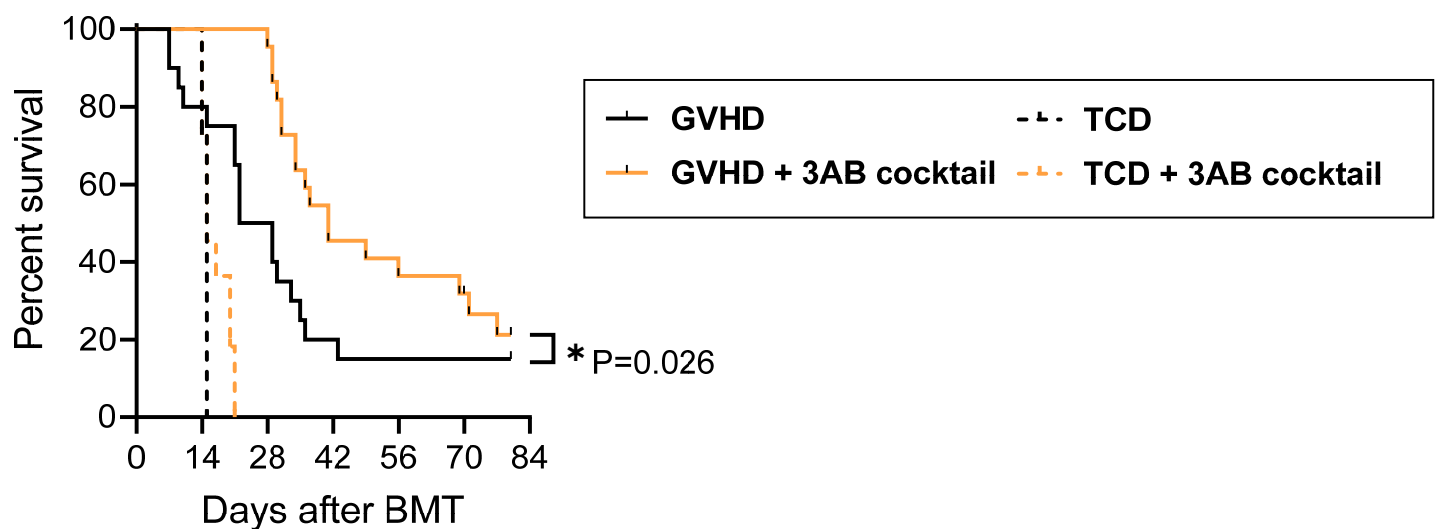**F**

GVHD

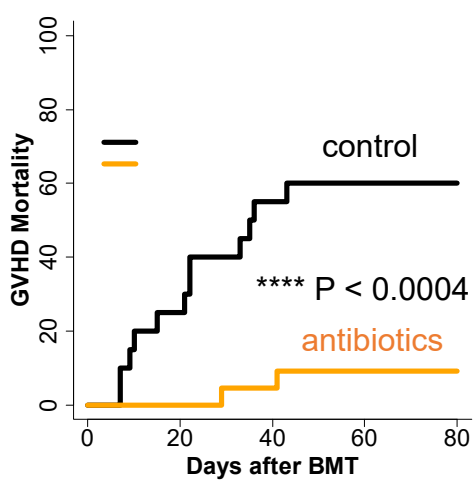**G**

Leukemia

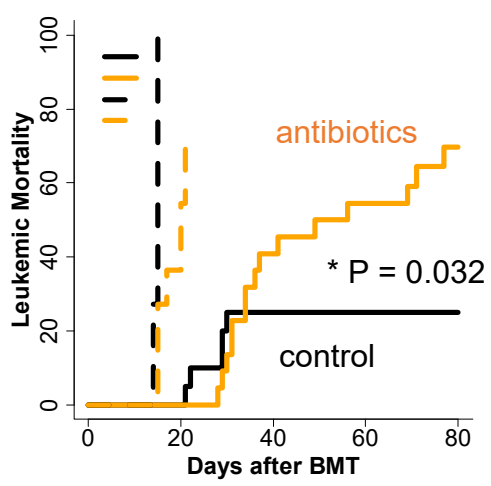

**Figure S2, related to Figure 5. Microbial abundance and evenness of species following antibiotic treatment, and effects on leukemia relapse.**

ADFH B6N mice were treated with the antibiotics shown for 2 weeks as described in **Figure 5A-E**. Fecal and ileal samples were collected before (feces only) and after treatment. Two sets of comparisons as 4AB cocktail, single antibiotics vs. normal H<sub>2</sub>O ( $n = 6$  per group combined from 2 replicate experiments) and 3AB cocktail vs. normal H<sub>2</sub>O ( $n = 6, 9$  per group combined from 2 replicate experiments). Shannon diversity index in pre-treatment (**A**), post-treatment fecal (**B, C**) and ileal (**D**) samples. Data presented as mean  $\pm$  SEM and analyzed with Welch's t-test with p-value adjusted using Holm's method. \* $p < 0.05$ , \*\* $p < 0.01$ , \*\*\* $p < 0.001$ , \*\*\*\* $p < 0.0001$ . (**E – G**) Lethally irradiated B6N CR mice were transplanted with  $10 \times 10^6$  BM and  $0.5 \times 10^6$  CD4<sup>+</sup> T cells from BALB/c mice with C57Bl/6-background MHC-II-expressing primary B cell acute lymphoblastic leukemia (*Arf*<sup>-/-</sup> *MSCV-RCSD1-ABL2-ires-GFP* + *MSCV-IK6-ires-RFP*) on day 0. The recipients of T cell depleted grafts (TCD) served as negative controls. The recipients in antibiotics groups received 3AB antibiotic water (Cefoxitin, Gentamicin and Vancomycin) as described in Methods. The recipients in control groups received normal water throughout. (**E**) Overall survival, (**F**) GVHD and (**G**) Leukemia death are shown. (3 experiments combined,  $n = 20 - 22$  per T cell deplete group,  $n = 11$  per TCD group, Log-rank test)

**A**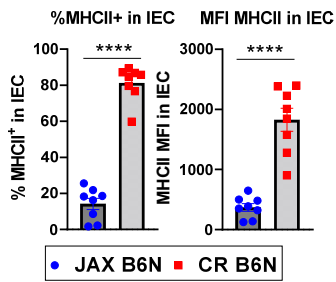**B**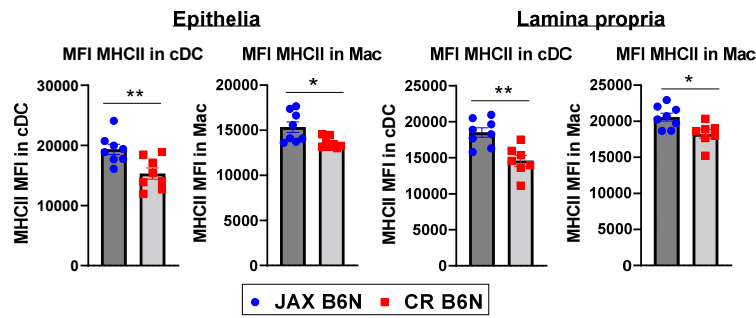**C****Ileum EL**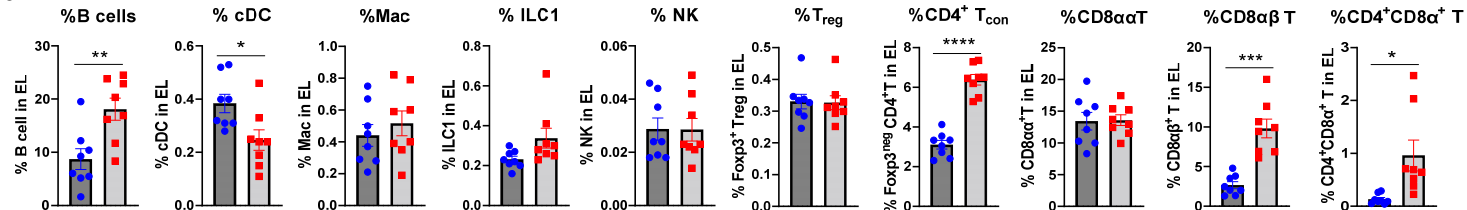**Ileum LP**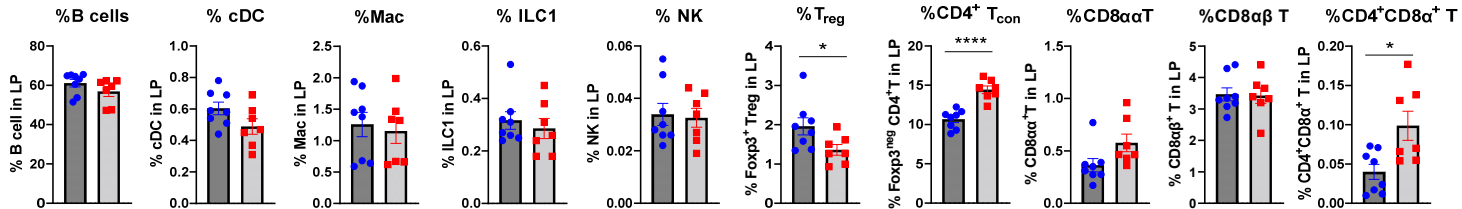**Spleen**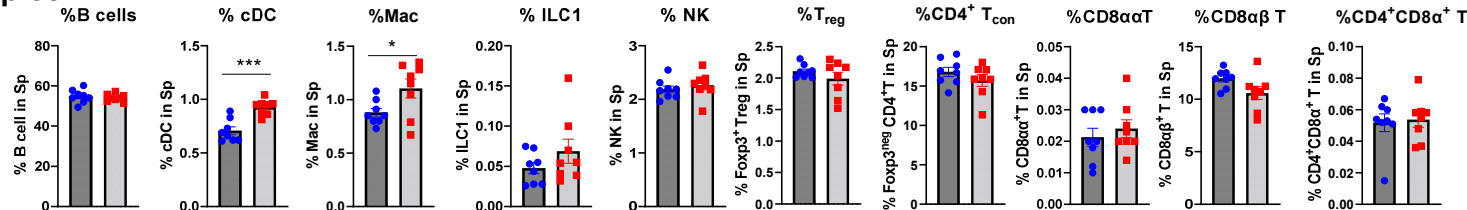**D****Ileum EL**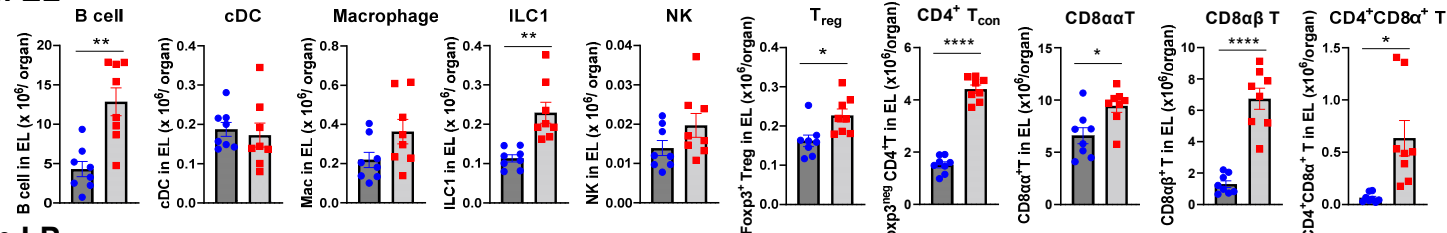**Ileum LP**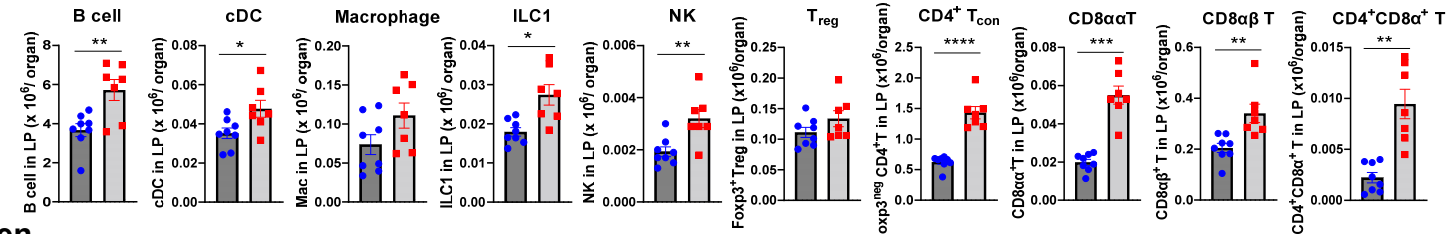**Spleen**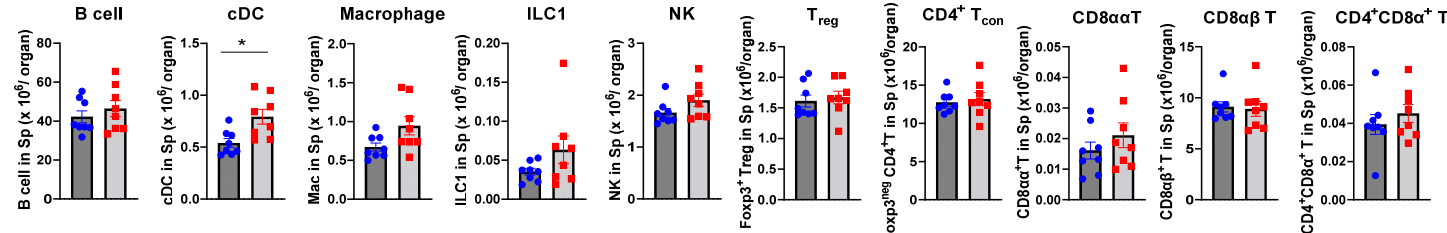

**Figure S3, related to Figure 1–5. Mice with high MHC-II expression on IEC have expanded numbers of T cells in the ileum.**

The ileal epithelial layer (EL), ileal lamina propria (LP) and spleen of naïve age-matched female B6N mice from JAX and CR were analyzed. (A) Quantification of MFI and % MHC-II expression by IEC (CD45<sup>neg</sup>CD326<sup>+</sup>). (B) Quantification of MHC-II MFI on conventional dendritic cells (cDC) (CD45<sup>+</sup>CD326<sup>neg</sup>CD3<sup>neg</sup>CD19<sup>neg</sup>NK1.1<sup>neg</sup>Ly6G<sup>neg</sup>SiglecH<sup>neg</sup>CD11c<sup>high</sup>CD64<sup>neg</sup>) and macrophages (CD45<sup>+</sup>CD326<sup>neg</sup>CD3<sup>neg</sup>CD19<sup>neg</sup>NK1.1<sup>neg</sup>Ly6G<sup>neg</sup>SiglecH<sup>neg</sup>CD64<sup>+</sup>) from ileal EL and LP. (C-D) Frequency and (C) absolute number (D) of each cell fraction: B cell (CD3<sup>neg</sup>CD19<sup>+</sup>), cDC, macrophage (Mac), innate lymphoid cell type 1 (ILC1) (CD3<sup>neg</sup>CD19<sup>neg</sup>NK1<sup>+</sup>CD49b<sup>neg</sup>CD11b<sup>neg</sup>CD200R<sup>+</sup>), NK cell (CD3<sup>neg</sup>CD19<sup>neg</sup>NK1<sup>+</sup>CD49b<sup>+</sup>CD200R<sup>neg</sup>), regulatory T cell (Treg) (CD3<sup>+</sup>CD19<sup>neg</sup>NK1<sup>neg</sup>CD4<sup>+</sup>CD8a<sup>neg</sup>Foxp3<sup>+</sup>), conventional CD4 T cell (CD4<sup>+</sup> Tcon) (CD3<sup>+</sup>CD19<sup>neg</sup>NK1<sup>neg</sup>CD4<sup>+</sup>CD8a<sup>neg</sup>Foxp3<sup>neg</sup>), CD8 $\alpha$  T cell (CD3<sup>+</sup>CD19<sup>neg</sup>NK1<sup>neg</sup>CD4<sup>neg</sup>CD8a<sup>+</sup>CD8 $\beta$ <sup>neg</sup>), CD8 $\alpha\beta$  T cell (CD3<sup>+</sup>CD19<sup>neg</sup>NK1<sup>neg</sup>CD4<sup>neg</sup>CD8a<sup>+</sup>CD8 $\beta$ <sup>+</sup>), CD4<sup>+</sup>CD8 $\alpha$ <sup>+</sup> T cell (CD3<sup>+</sup>CD19<sup>neg</sup>NK1<sup>neg</sup>CD4<sup>+</sup>CD8a<sup>+</sup>). (A-D) Data shown with mean  $\pm$  SEM ( $n = 8$  per group combined from 2 replicate experiments). t-test with Welch's correction. \* $p < 0.05$ , \*\* $p < 0.01$ , \*\*\* $p < 0.001$ , \*\*\*\* $p < 0.0001$ .

**A**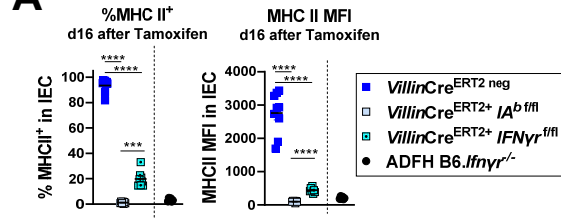**B**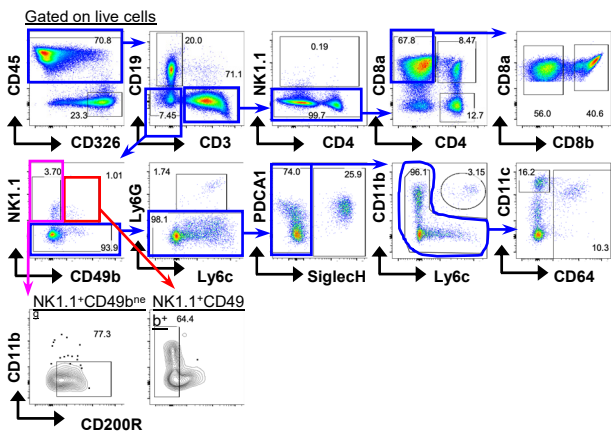**F**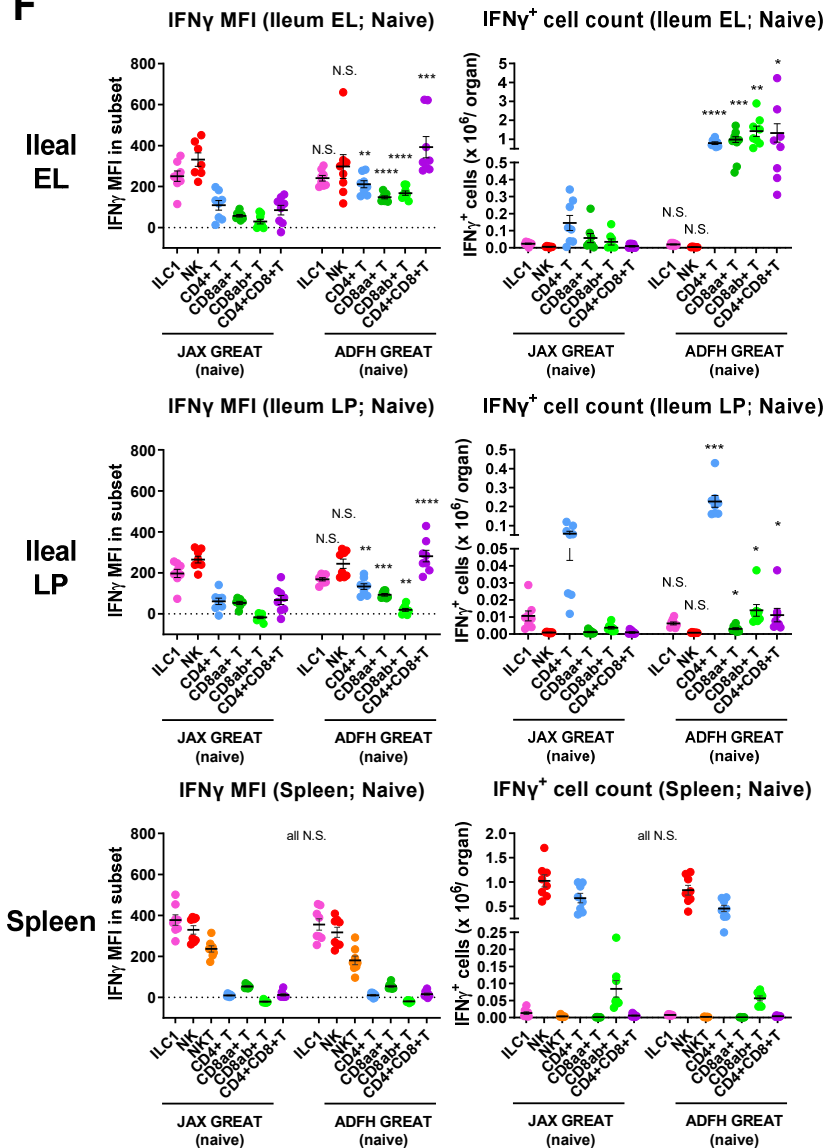**C**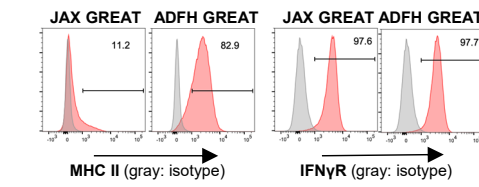**D**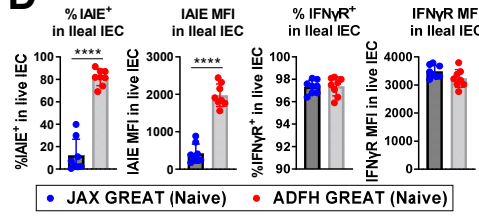**G**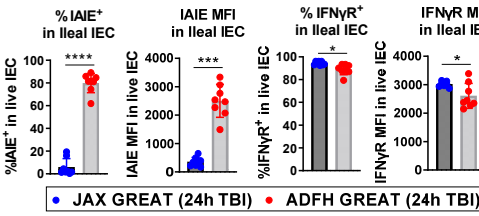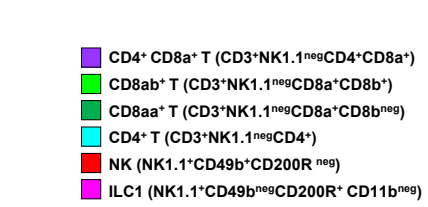**E**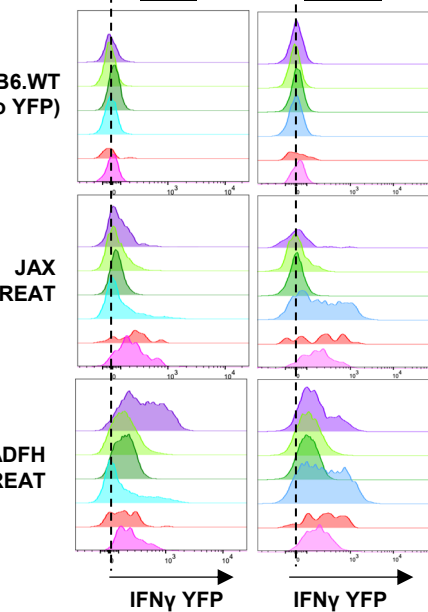**I**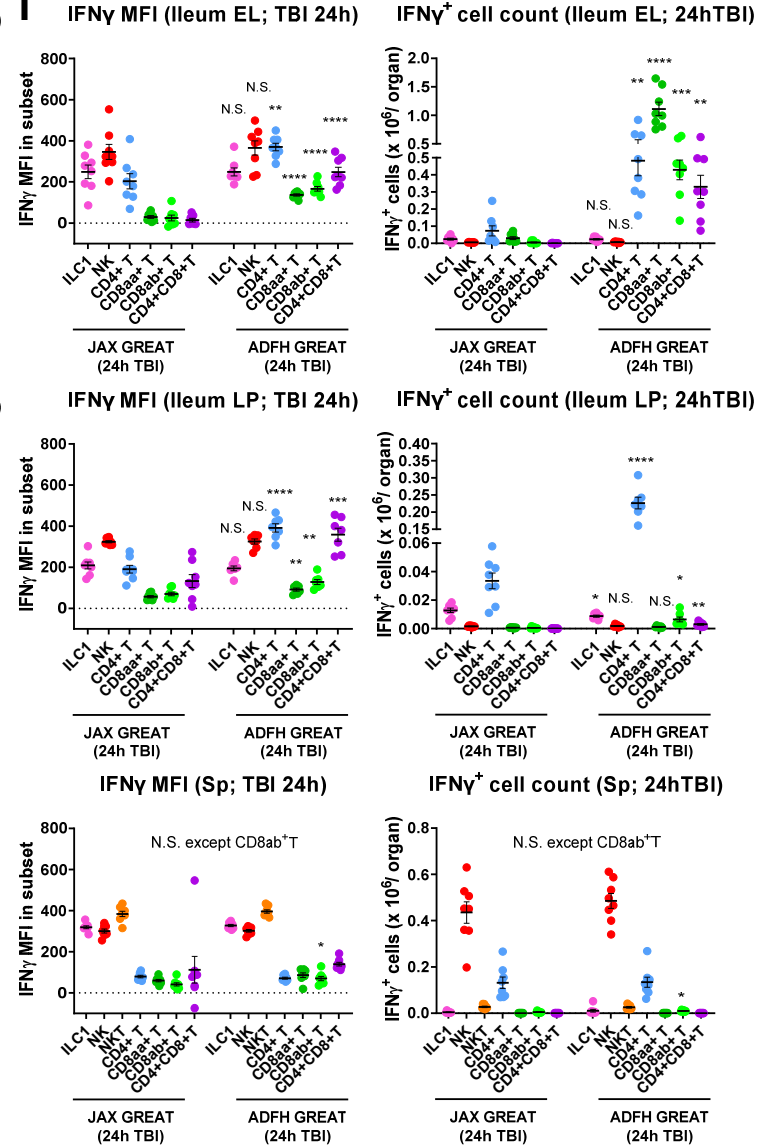

**Figure S4, related to Figure 1–5. IFN $\gamma$  secreting lymphocytes in the ileum control MHC II expression.**

(A) Naïve *VillinCre-ER*<sup>T2<sup>neg</sup></sup>, *VillinCre-ER*<sup>T2<sup>+</sup></sup> *I-A<sup>b</sup>*<sup>fl/fl</sup>, *VillinCre-ER*<sup>T2<sup>+</sup></sup> *Ifn $\gamma$ R1*<sup>fl/fl</sup> were treated with tamoxifen for five days. 16 days after the initial tamoxifen administration, ileal IEC were assessed for MHC II expression. 2 experiments combined, n = 7-9 per group (mean  $\pm$  SEM). Brown-Forsythe and Welch's ANOVA test and Dunnett's T3 multiple comparison test. ADFH B6.*Ifn $\gamma$ R*<sup>-/-</sup> data are shown as reference (n = 6). (B - I) Cellular compartments of naïve (B - F) or 24h post-TBI (1000 cGy) (G - I) age-matched female GREAT mice from JAX and ADFH. (B) Gating strategy for ileal EL, (C) MHC-II and IFN $\gamma$ R expression on IEC, (D, G) Quantification of MHC-II and IFN $\gamma$ R expression by IEC, (E, H) representative histograms of IFN $\gamma$ -YFP MFI by each cell subset, and (F, I) IFN $\gamma$ -YFP MFI and absolute number of IFN $\gamma$ -expressing cells in the ileum and spleen. 2 experiments combined, n = 8 per group (mean  $\pm$  SEM). t-test with Welch's correction. \*p < 0.05, \*\*p < 0.01, \*\*\*p < 0.001, \*\*\*\*p < 0.0001. N.S.: not significant. TBI: total body irradiation.



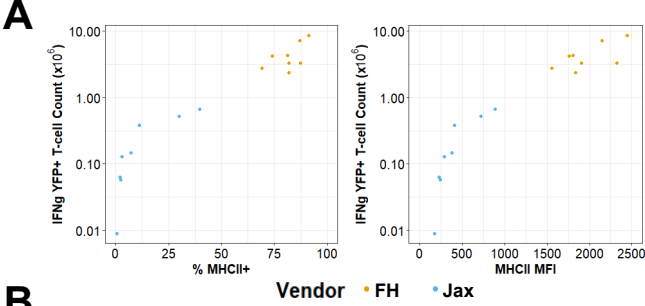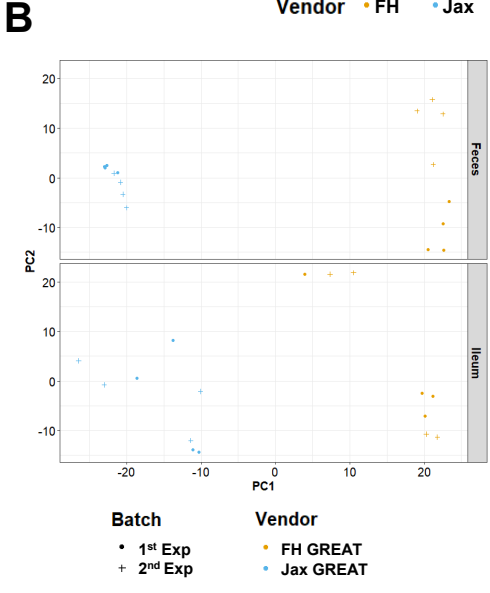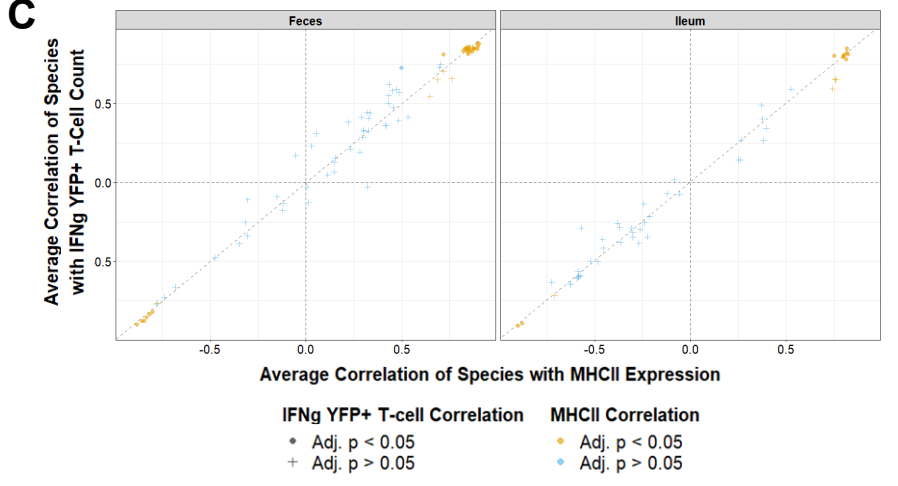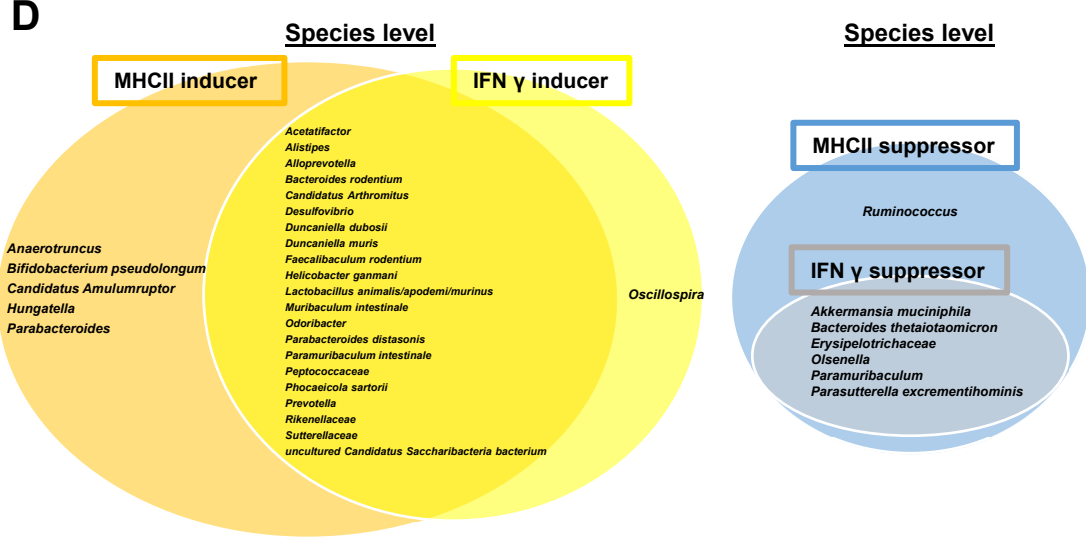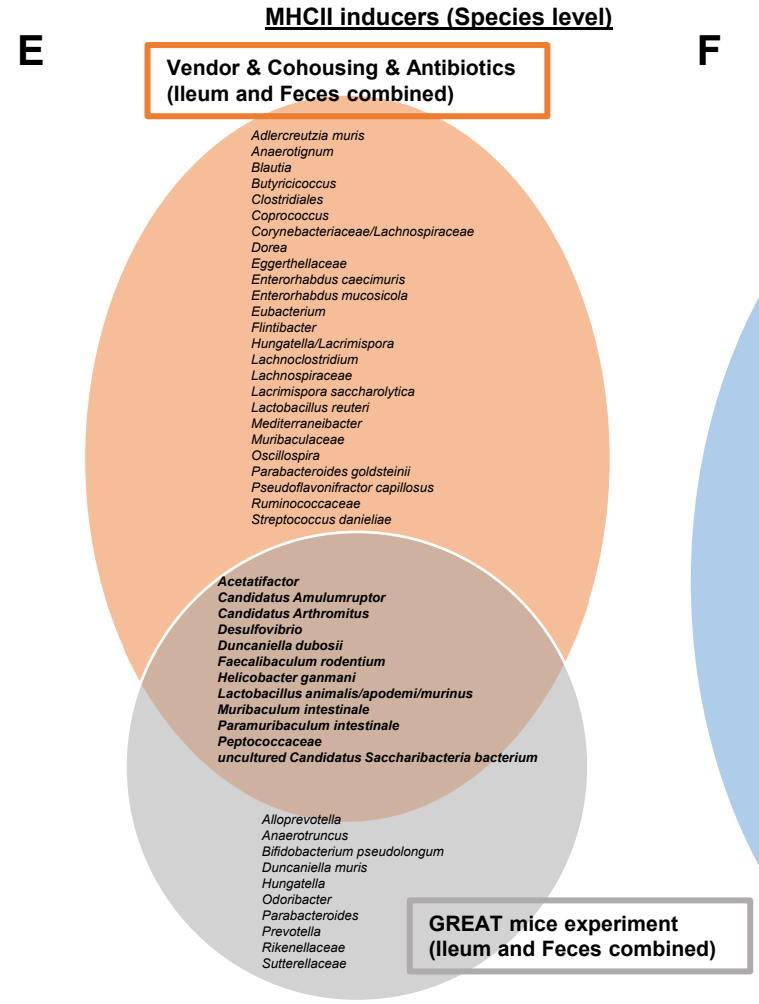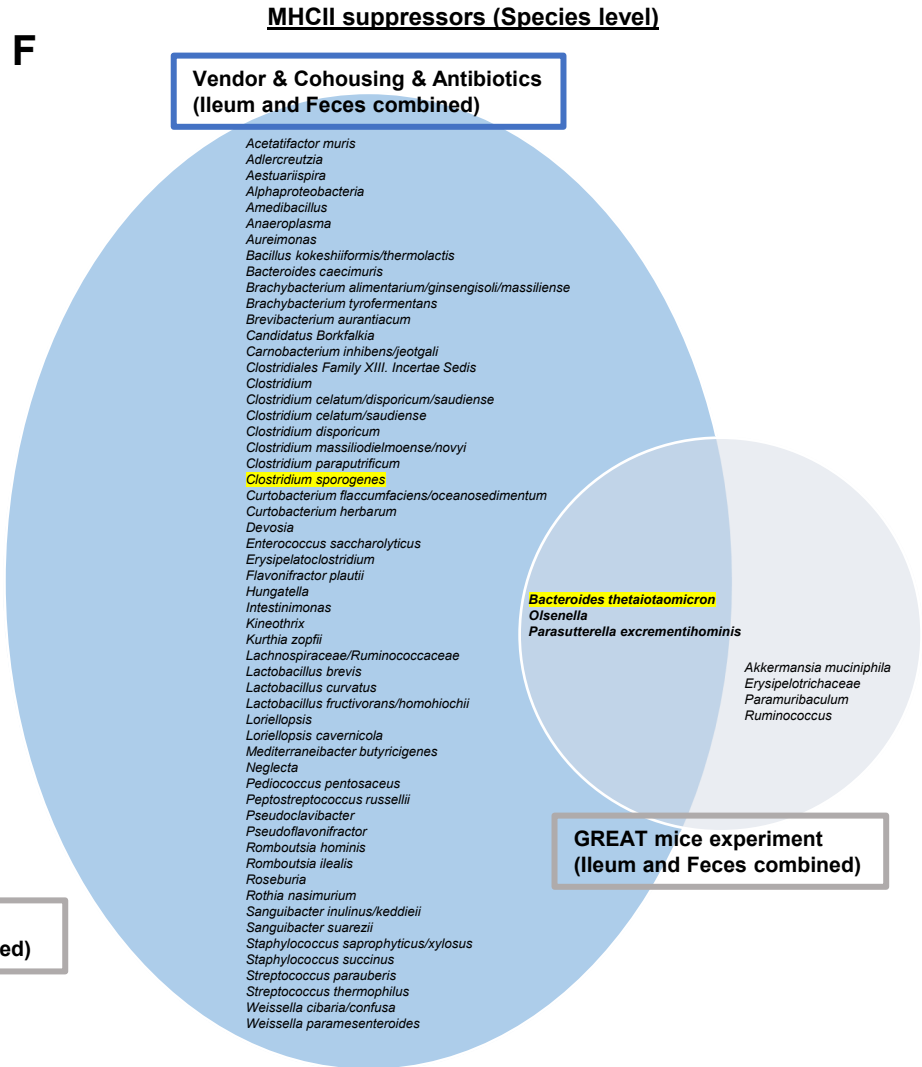

**Figure S5, related to Figure 1–5. Bacterial species in the GI tract correlate with both IEC MHC-II expression and IFN $\gamma$ -producing T cells.**

Fecal and ileal microbiota from naïve JAX and ADFH GREAT mice shown in **Figure S4** were analyzed by 16S rRNA gene sequencing. 2 experiments combined, n = 8 per group. **(A)** Spearman's correlation. Frequency of MHC-II<sup>+</sup> IEC vs. IFN $\gamma$ -YFP<sup>+</sup> T cell counts: 0.92, p < 0.001. MHC-II MFI on IEC vs. IFN $\gamma$ -YFP<sup>+</sup> T cell counts: 0.93, p < 0.001. **(B)** Principal component analysis (PCA) plot of centered log-ratio (CLR)-transformed abundance to visualize the fecal (**top**) and ileal (**bottom**) microbiota of mice from 2 batches (experiments) and 2 vendors. **(C)** Spearman's correlation. Average correlation of species with MHC-II expression by IEC vs Average correlation of species with IFN $\gamma$ -YFP<sup>+</sup> T cell counts of fecal samples (**left**: coefficient = 0.98, p < 0.001) and ileal sample (**right**: coefficient = 0.98, p < 0.001). **(D)** Venn diagrams of species level MHC-II inducers and IFN $\gamma$  inducers (**left**) and MHC-II suppressors and IFN $\gamma$  suppressors (**right**), combined from fecal and ileal samples. **(E – F)** Venn diagrams of species level of **(E)** MHC-II inducers and **(F)** suppressors determined across three experimental systems (Vendor, Cohousing and Antibiotic treatment) and vendor comparison of GREAT mice (JAX vs ADFH) combined from fecal and ileal samples. *Paramuribaculum*, *Ruminococcaceae*, *Bacteroides acidifaciens*, *Duncaniella*, *Prevotella*, *Alistipes*, *Bacteroides rodentium*, *Parabacteroides distasonis* and *Phocaeicola sartorii* had conflicting inducer and suppressor categorizations in separate experiments and are excluded here.

**A**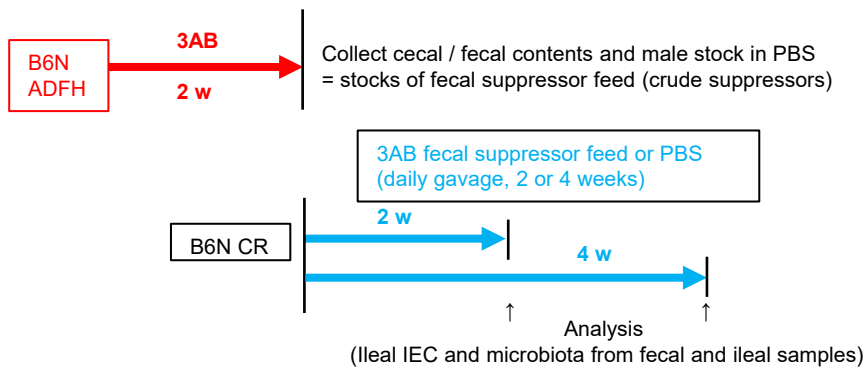**B**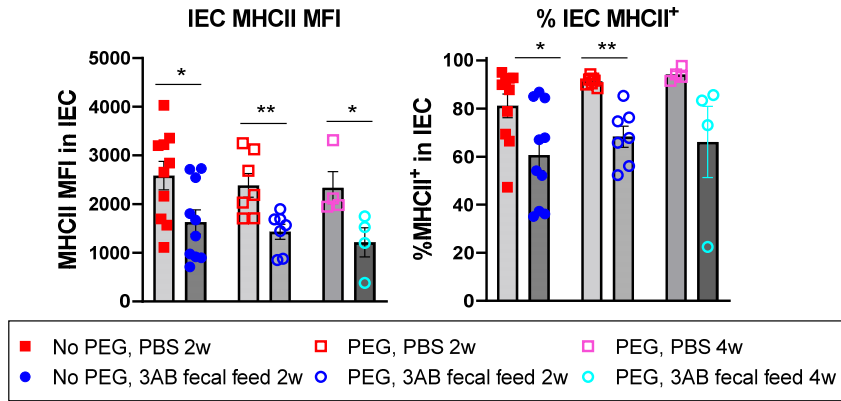**C**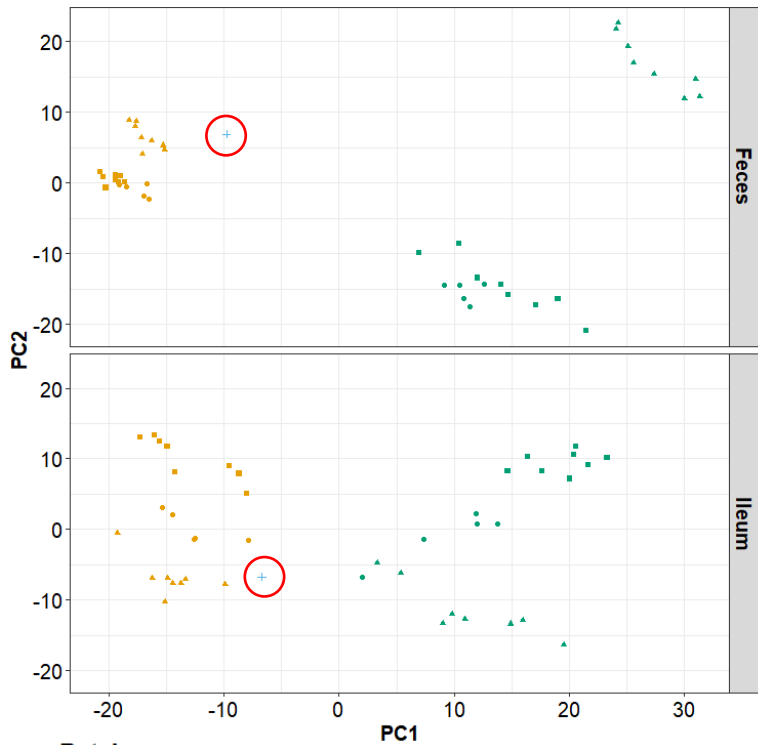**Batch**

- 1<sup>st</sup> exp (No PEG, 2w)
- ▲ 2<sup>nd</sup> exp (No PEG or with PEG, 2w)
- 3<sup>rd</sup> exp (with PEG, 2w or 4w Tx)

⊕ 3AB-fecal Feed

**Gavage Group**

- 3AB-fecal
- ⊕ 3AB-fecal Feed
- PBS

**D**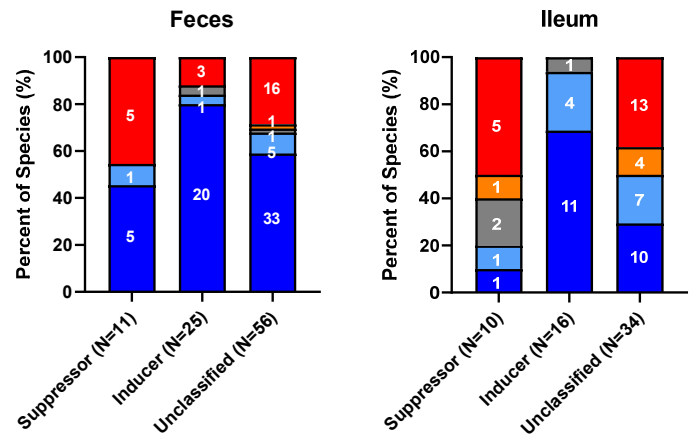**Genus-level classification**

Change in Species at Prevalence or Abundance (3AB-fecal gavage vs PBS gavage)

- Increase ( $p < 0.05$ )
- Lean increase ( $p > 0.05$ )
- None (conflict with  $p > 0.05$ )
- Lean decrease ( $p > 0.05$ )
- Decrease ( $p < 0.05$ )

**Figure S6, related to Figure 6. Transfer of MHC-II suppressors reduce MHC-II expression by IEC in the ileum.**

(A) Experimental schema. Naïve CR B6N mice were administered 3AB suppressor enriched fecal feed or PBS (200  $\mu$ l/dose) by oral gavage daily for 2 or 4 weeks, then assessed for ileal IEC and fecal and ileal 16S rRNA gene sequencing analysis with or without PEG conditioning as described in Methods (B) Quantification of MFI and % MHC-II expression on IEC (CD45<sup>neg</sup>CD326<sup>+</sup>). No PEG, 2 week gavage treatment: n = 10 per group, 2 experiments combined. PEG conditioned, 2 week gavage treatment: n = 7 per group, 2 experiments combined. PEG conditioned, 4 week gavage treatment: n = 4 per group, 1 experiment. t-test with Welch's correction. \*p < 0.05, \*\*p < 0.01. (C-D) 16S rRNA gene sequencing of fecal and ileal samples. (C) PCA plot of CLR-transformed abundance of fecal (**top**) and ileal (**bottom**) microbiota of mice from 3 experiments. The contents of 3AB suppressor enriched feed was included in the sequencing. (D) Detected species were assigned as MHC-II inducers, suppressors or unclassified bacteria based on the classification at the genus-level from prior experimental systems (Vendor, Cohousing and Antibiotic treatment). The number of species that changed in terms of prevalence or abundance after 3AB suppressor enriched feed treatment versus PBS treatment is shown in each MHC-II group. Change was classified by the direction of change in prevalence or abundance (increased or decreased) if the corresponding unadjusted p-value was <0.05. If the p-value > 0.05, change was classified as "lean increased" or "lean decreased" unless the change in prevalence and abundance disagreed, in which case the change was classified as "none."

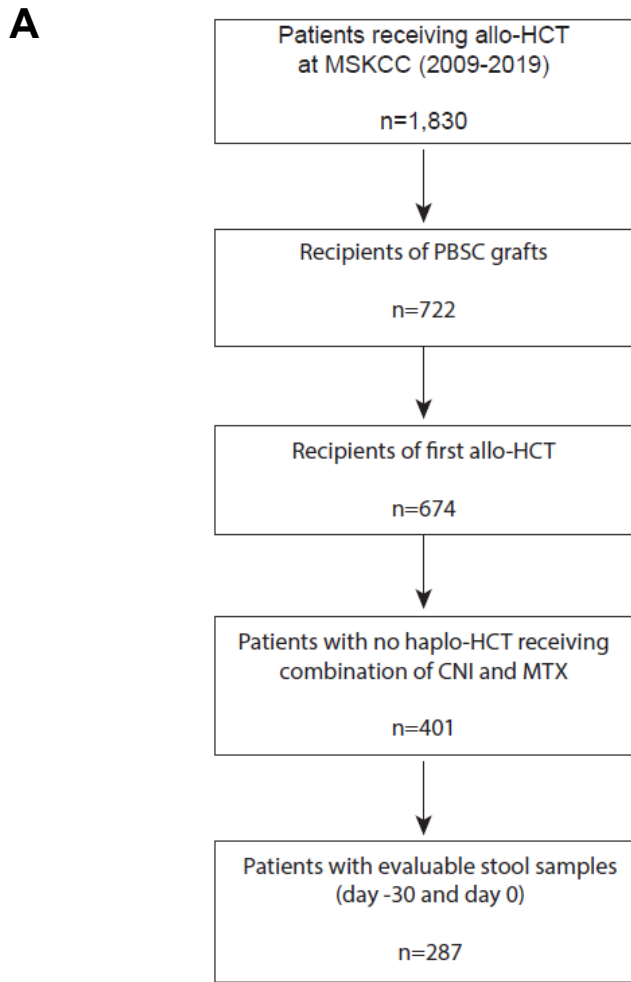

Allo-HCT: allogeneic hematopoietic cell transplant; MSKCC: Memorial Sloan Kettering Cancer Center; PBSC: peripheral blood stem cell graft; CNI: calcineurin inhibitor; MTX: methotrexate.

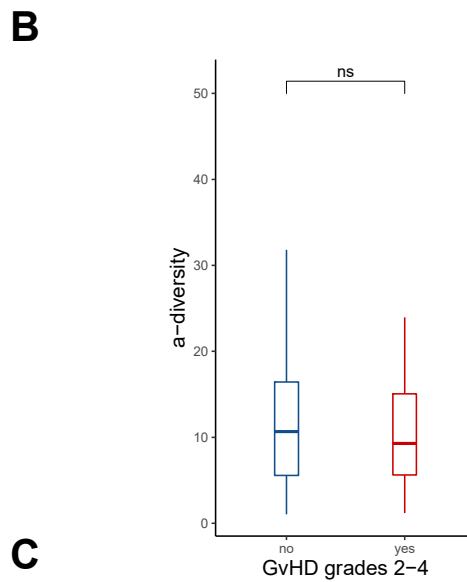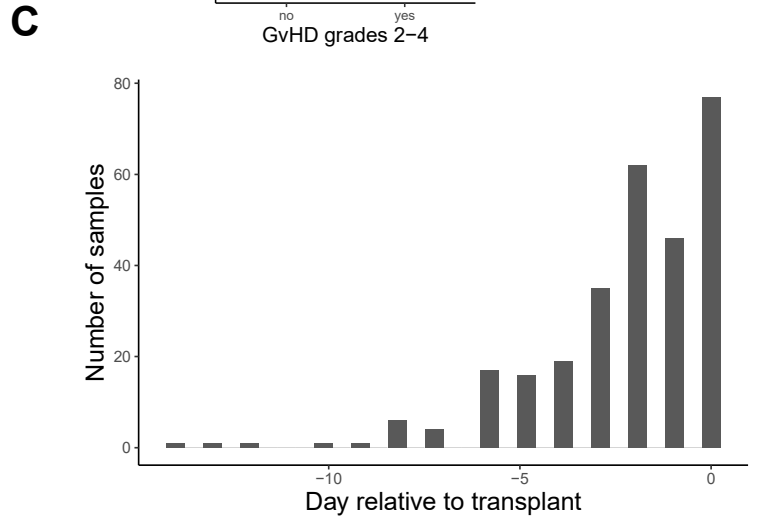

**D**

MHCII inducers (Fecal and Ileum combined, Genus level)

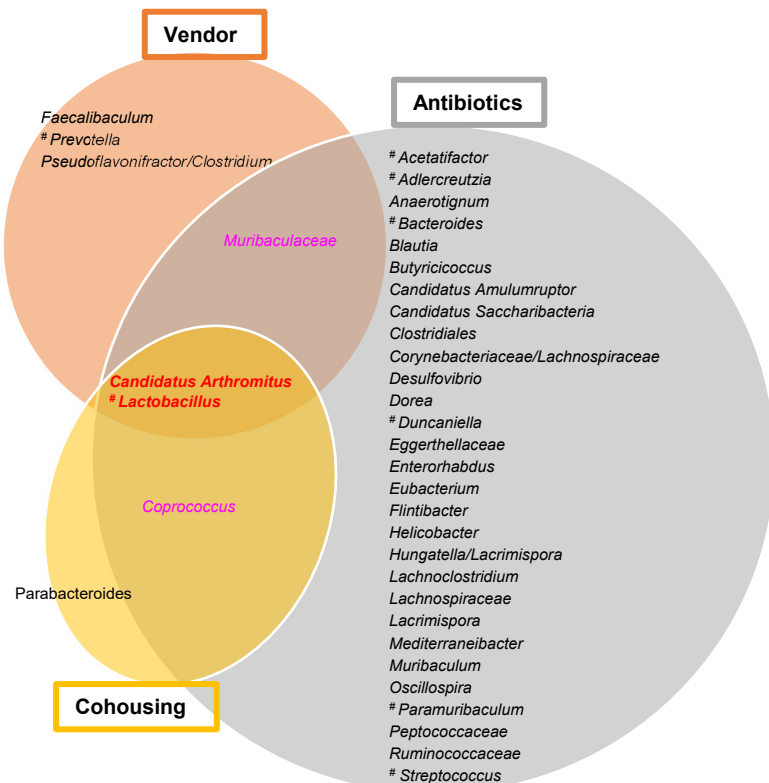

**E**

MHCII suppressors (Fecal and Ileum combined, Genus level)

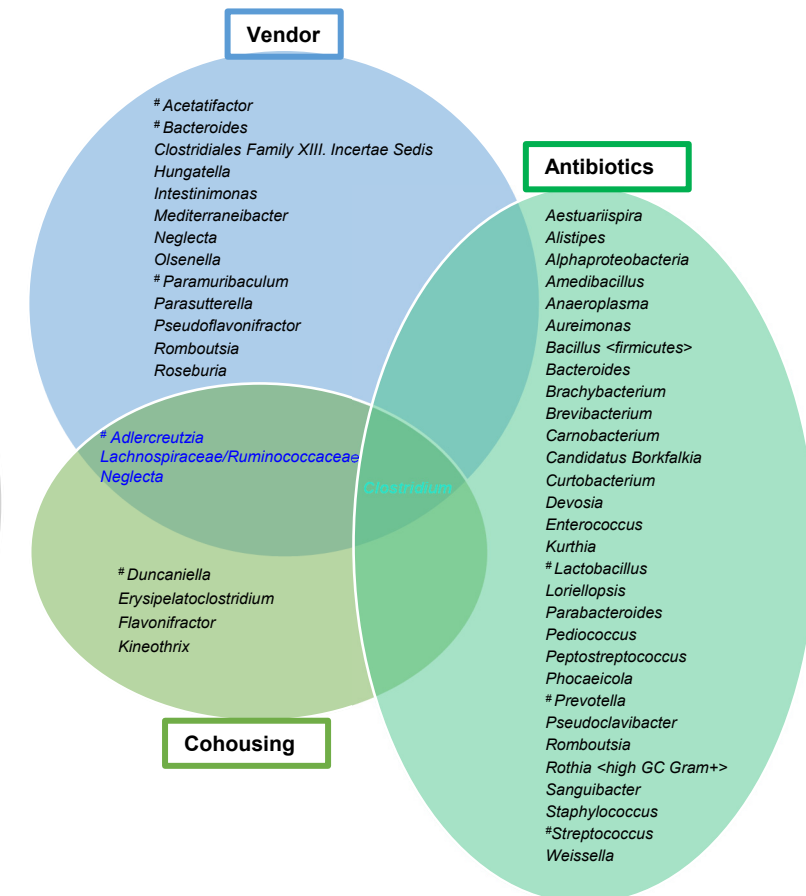

**Figure S7, related to Figure 7. Consort flow diagram of clinical sample selection and genus-rank MHC-II inducers and suppressors.**

(A) Patients receiving alloSCT at Memorial Sloan Kettering Cancer Center (MSKCC) were screened to include a total of 287 patients that received their first alloHCT with peripheral blood stem cells (PBSC) and GVHD prophylaxis with a calcineurin inhibitor (CNI) and methotrexate (MTX). (B)  $\alpha$ -diversity using the Simpson reciprocal index in GVHD grades 2-4 vs grade 0-1.  $P = 0.36$ , one-way ANOVA. (C) Histogram demonstrating the distribution of samples included in this analysis. (D – E) Venn diagrams of genus rank of (D) MHC-II inducers and (E) suppressors determined across prior experimental systems (Vendor, Cohousing and Antibiotic treatment) combined from fecal and ileal samples. #These genera include species categorized as inducers or suppressors.

Table S1 , related to Figure 7. Patient characteristics.

|                                           | All patients<br>n=287 (%) |
|-------------------------------------------|---------------------------|
| Sex = M (%)                               | 187 (65.2)                |
| Age (mean (SD))                           | 57.1 (12.3)               |
| <b>Disease</b>                            |                           |
| Leukemia                                  | 131 (45.6)                |
| Lymphoma                                  | 115 (40.0)                |
| MDS/MPN                                   | 37 (12.9)                 |
| Multiple Myeloma                          | 4 (1.4)                   |
| <b>Conditioning Intensity (%)</b>         |                           |
| Ablative                                  | 77 (26.8)                 |
| Non-ablative                              | 69 (24.0)                 |
| Reduced Intensity                         | 141 (49.1)                |
| <b>Regimen</b>                            |                           |
| Fludarabine/Melfalan                      | 107 (37.3)                |
| Cyclophosphamide/Fludarabine/TBI          | 70 (24.4)                 |
| Fludarabine/Busulfan                      | 52 (18.1)                 |
| Cyclophosphamide/fludarabine/thiotepa/TBI | 27 (9.4)                  |
| Busulfan/Melfalan                         | 11 (3.8)                  |
| Cyclophosphamide/thiotepa/TBI             | 8 (2.8)                   |
| Clofarabine/melphalan/thiotepa            | 6 (2.1)                   |
| Busulfan/cyclophosphamide                 | 2 (0.7)                   |
| Cyclophosphamide/TBI                      | 2 (0.7)                   |
| Etoposide/TBI                             | 1 (0.3)                   |
| Carmustine/Cytarabine/Etoposide/Melphalan | 1 (0.3)                   |
| <b>Donor match (%)</b>                    |                           |
| Related Identical                         | 94 (32.8)                 |
| Unrelated Identical                       | 176 (61.3)                |
| Unrelated Non-identical                   | 17 (5.9)                  |
| <b>Graft (%)</b>                          |                           |
| PBSC                                      | 287 (100)                 |
| <b>Comorbidity/age index (m=259)</b>      |                           |
| 0                                         | 4 (1.5)                   |
| 1-2                                       | 89 (34.4)                 |
| ≥3                                        | 166 (64.1)                |
| <b>GVHD (first 100 days) = Y (%)</b>      | 142 (49.5)                |
| Grade 1                                   | 25 (17.6)                 |
| Grade 2                                   | 83 (58.5)                 |
| Grade 3                                   | 26 (18.3)                 |
| Grade 4                                   | 8 (5.6)                   |
| <b>TRM</b>                                | 45 (15.7)                 |

MDS/MPN: myelodysplastic syndrome/myeloproliferative neoplasm;

GvHD: graft versus host disease; TRM: transplant related mortality within 2 years.

**Table S2, related to Figure 7. Antibiotic exposure prior to stool sample collection**

|                                  | <b>GVHD gr 0-1<br/>(n=170)</b> | <b>GVHD gr 2-4<br/>(n=117)</b> | <b>Total<br/>(n=287)</b> |
|----------------------------------|--------------------------------|--------------------------------|--------------------------|
| Cephalosporin IV                 | 16                             | 12                             | 28                       |
| Cephalosporin PO                 | 1                              | 0                              | 1                        |
| Trimethoprim/Sulfamethoxazole PO | 20                             | 9                              | 29                       |
| Trimethoprim/Sulfamethoxazole IV | 3                              | 2                              | 5                        |
| Vancomycin IV                    | 14                             | 11                             | 25                       |
| Vancomycin PO                    | 1                              | 0                              | 1                        |
| Quinolone IV                     | 5                              | 1                              | 6                        |
| Quinolone PO                     | 2                              | 9                              | 11                       |
| Piperacillin/Tazobactam IV       | 5                              | 2                              | 7                        |
| Metronidazole PO                 | 1                              | 1                              | 2                        |
| Metronidazole IV                 | 1                              | 0                              | 1                        |
| Clindamycin IV                   | 1                              | 0                              | 1                        |
| Azithromycin PO                  | 1                              | 0                              | 1                        |
| Nitrofurantoin PO                | 1                              | 0                              | 1                        |
| Penicillin V                     | 1                              | 0                              | 1                        |



**Table S3, related to Figure 7. Immunofluorescence staining panel.**

| Position | Antibody         | Manufacturer | catalog # | Host  | Clone            | Dilution | Concentration | Secondary                           | Fluorophore               |
|----------|------------------|--------------|-----------|-------|------------------|----------|---------------|-------------------------------------|---------------------------|
| 1        | EpCAM            | Biologend    | 32402     | Mouse | 9C4              | 1:400    | 1.25ug/ml     | Leica<br>Powervision<br>mouse HRP   | Akoya Opal<br>570 reagent |
| 2        | CD45 LCA         | DAKO         | M0701     | Mouse | 2B11 +<br>PD7/26 | 1:500    | 0.75 ug/ml    | Akoya Opal<br>polymer<br>ms+rbt HRP | Akoya Opal<br>520 reagent |
| 3        | HLA-<br>DR+DP+DQ | Abcam        | ab7856    | Mouse | CR3/43           | 1:500    | 0.4ug/ml      | Akoya Opal<br>polymer<br>ms+rbt HRP | Akoya Opal<br>690 reagent |

| Position | Antibody   | Manufacturer | catalog # | Host  | Clone            | Dilution | Concentration | Secondary                           | Fluorophore               |
|----------|------------|--------------|-----------|-------|------------------|----------|---------------|-------------------------------------|---------------------------|
| 1        | EpCAM      | Biologend    | 32402     | Mouse | 9C4              | 1:400    | 1.25ug/ml     | Leica<br>Powervision<br>mouse HRP   | Akoya Opal<br>570 reagent |
| 2        | CD45 LCA   | DAKO         | M0901     | Mouse | 2B11 +<br>PD7/26 | 1:500    | 0.75 ug/ml    | Akoya Opal<br>polymer<br>ms+rbt HRP | Akoya Opal<br>520 reagent |
| 3        | Mouse IgG1 | R&D systems  | MAB002    | Mouse | 11711            | 1:500    | 0.4ug/ml      | Akoya Opal<br>polymer<br>ms+rbt HRP | Akoya Opal<br>690 reagent |

**Table S5, related to Figure 6. Culture media**

| <b>Component</b>                     | <b>Amount (mg if there is no note)</b> | <b>Supplier</b> | <b>Catalog#</b> |
|--------------------------------------|----------------------------------------|-----------------|-----------------|
| NaHCO <sub>3</sub>                   | 28.75                                  | Sigma           | S4019           |
| MgSO <sub>4</sub> .7H <sub>2</sub> O | 14.38                                  | Sigma           | M63-500         |
| NaCl                                 | 57.50                                  | Sigma           | S3014           |
| CaCl <sub>2</sub>                    | 0.58                                   | Sigma           | C7902           |
| FeSO <sub>4</sub>                    | 0.29                                   | Sigma           | F8048           |
| BBL Tryptone peptone                 | 10029.14                               | BD              | 211921          |
| Bacto Yeast extract                  | 5014.57                                | BD              | 212750          |
| Glucose                              | 2005.83                                | Sigma           | G8270           |
| Cysteine (free base)                 | 501.46                                 | Sigma           | C1276           |
| KH <sub>2</sub> PO <sub>4</sub>      | 4111.95                                | Sigma           | P0662           |
| K <sub>2</sub> HPO <sub>4</sub>      | 12235.56                               | Sigma           | P3786           |
| meat extract                         | 5                                      | Sigma           | 70164           |
| Vitamin K                            | 1                                      | Sigma           | M5625           |
| Hematin                              | 1 ml                                   | Sigma           | H3281           |
| ATCC Viotamin mix                    | 1 ml                                   | ATCC            | ATCC MD-VS      |
| ATCC Mineral mix                     | 1 ml                                   | ATCC            | ATCC MD-TMS     |
| Tween 80                             | 200 ul                                 | Sigma           | P1754           |
| cellobiose                           | 1                                      | Sigma           | C7252           |
| maltose                              | 1                                      | Sigma           | M5885           |
| fructose                             | 1                                      | Sigma           | F0127           |
| sodium acetate                       | 1                                      | Fisher (Fluka)  | BP333-500       |
| sodium sulfate                       | 2                                      | Sigma           | S9627           |
| malic acid                           | 1                                      | Sigma           | M7937           |
| dH <sub>2</sub> O                    | 1 L                                    |                 |                 |
